# Supplementary material for: Sublimation-doping with super bases for high-performance solution-processed heterojunction oxide thin film transistors
Source: Royal Society of Chemistry journal article supplement (doi:10.1039/d1mh00929j), 2021-01-01
Supplement: d1mh00929j1.pdf [file d1mh00929j1.pdf]

## Electronic Supplementary Information (ESI)

### **Sublimation-Doping with Super Bases for High-Performance Solution- Processed Heterojunction Oxide Thin Film Transistors**

Juhyeok Lee, Mingyu Jae, Syed Zahid Hassan, and Dae Sung Chung\*

Department of Chemical Engineering, Pohang University of Science and Technology (POSTECH), Pohang 37673,  
Republic of Korea

\*Correspondence: dchung@postech.ac.kr (D. S. Chung)

## Experimental Section

### Base preparation

In amidine-based organic dopants, 1,8-diazabicyclo[5.4.0]undec-7-ene (DBU) and 1,5,7-triazabicyclo[4.4.0]dec-5-ene (TBD) were purchased from Sigma-Aldrich. For synthesis of 1,1-(1,10-Decanediy)bis[1,3,4,6,7,8-hexahydro-2H-pyrimido[1,2- $\alpha$ ]pyrimidine] (2TBD-C10), 1,10-dibromodecane and NaH (60%, dispersion in paraffin liquid) were purchased from TCI.  $\text{CDCl}_3$  and anhydrous THF were purchased from Sigma Aldrich. n-Hexane and dichloromethane (DCM) were purchased from Daejung Chemicals Korea. To the oven-dried 50 ml Schlenk flask with stir bar under nitrogen, dry THF (50 mL) was loaded followed by the addition of NaH (60%, dispersion in paraffin liquid, 0.39 g, 9.33 mmol). After 0.5 h, TBD (1 g, 7.18 mmol) was slowly added and stirring was further continued for 4 h followed by addition of 1,10-dibromodecane (0.91 g, 2.87 mmol). Reaction mixture was stirred at room temperature overnight under nitrogen. The crude mixture was filtered and rinsed with DCM. The filtrate was evaporated under reduced pressure to yield a white waxy solid which was purified by dissolving in small amounts of hexane (5 mL). The hexane fractions were collected and evaporated under reduced pressure. This was repeated for 3 times such that colorless liquid was remained without any impurities. 2TBD-C10 was obtained as white waxy solid (0.954 g, 79 % yield).<sup>51</sup>

### Precursor preparation

For spin coating of  $\text{In}_2\text{O}_3$ , indium nitrate hydrate ( $\text{In}(\text{NO}_3)_3 \cdot x\text{H}_2\text{O}$ ) was dissolved in deionized water (DIW) to achieve a 0.1 M and stirred at room temperature for 6 h before use. For spin coating of ZnO, 1.0 g of zinc acetate dihydrate ( $\text{Zn}(\text{CH}_3\text{COO})_2 \cdot 2\text{H}_2\text{O}$ ) was dissolved in 10 mL of 2-methoxyethanol and 0.28 mL of ethanolamine. The ZnO precursor solution was stirred at 60°C for 3 h before use. For  $\text{ZrO}_2$  dielectric layer, zirconium(IV) acetylacetonate ( $\text{Zr}(\text{C}_5\text{H}_7\text{O}_2)_4$ ) was dissolved in 5 mL of dimethylformamide (DMF) and 30.18  $\mu\text{L}$  of ethanolamine to achieve a 0.1 M and stirred at 70°C for 3 h before use. All materials required for the experiments were used as received from Sigma-Aldrich without any pretreatment.

### Thin film fabrication

Highly doped silicon ( $\text{Si}^{++}$ ) as the gate electrode and 300 nm thick thermally grown  $\text{SiO}_2$  as gate dielectric layer were used as the substrate of TFT. To remove organic residues from substrates, these were cleaned by piranha solution that is a mixture of sulfuric acid ( $\text{H}_2\text{SO}_4$ ) : 30% of hydrogen peroxide ( $\text{H}_2\text{O}_2$ ) (7:3), followed by  $\text{O}_2$  plasma for 5 min. For  $\text{ZrO}_2$  dielectric layers, the  $\text{ZrO}_2$  precursor solution was filtered by 0.2  $\mu\text{m}$  PTFE filter and the Si wafers were spin-coated at 4000 rpm for 30 s and treated by UV irradiation for 40 min. Then, the substrates were annealed at 300°C for 1 h. The areal capacitance of  $\text{ZrO}_2$  layer was measured as 370 nFcm<sup>-2</sup> by 4284A Precision LCR Meter. For the heterojunction active layer, the  $\text{In}_2\text{O}_3$  precursor solution was first spin coated at 3000 rpm for 30 s and subsequently annealed at 260°C for 1 h. After cooling for enough time, the ZnO precursor solution was spin coated at 4000 rpm for 30 s. For sublimation-based doping, the films were exposed to vapor of the amidine-based organic dopants such as DBU, TBD, and 2TBD for different time (3, 6, and 9 min) in glove box. In DBU doping, the vapor was generated by heating one drops of DBU solution in a covered glass bottle at 80°C on a hot plate.<sup>52</sup> In TBD and 2TBD doping, the vapor was generated by heating 0.1 mmol of TBD and 2TBD powder in a covered glass bottle at 150°C and 210°C, respectively, on a hot plate. After sublimation-doping, the substrates were annealed at 210°C for 1 h. TFTs were completed with the 100 nm thick thermal deposition of Al source and drain electrodes under high vacuum condition through metal shadow masks.

### Device characterization

The electrical characterizations of the transistors such as transfer, output, C-V, breakdown voltage, and bias-stress stability characteristics were performed at room temperature in a nitrogen glove box using a Keithley 2450 parameter analyzer. The electron mobility was evaluated in the saturation region by<sup>53</sup>

$$\mu_{\text{sat}} = \frac{L}{WC_1} \frac{\partial^2 I_{D,\text{sat}}}{\partial V_G^2}$$

where L and W are the length and width of the channel, respectively,  $C_1$  is the capacitance of the gate dielectric,  $I_{D,\text{sat}}$  is the saturation drain current, and  $V_G$  is the gate voltage.

UPS and XPS were performed with an ESCALAB 250Xi photoelectron spectrometer under high vacuum and an ultraviolet source of He I (21.2 eV) was used. Depth profile analysis was performed by SIMS (IMS 6F, CAMECA) using impact energy of 5 keV and current of 5 nA.

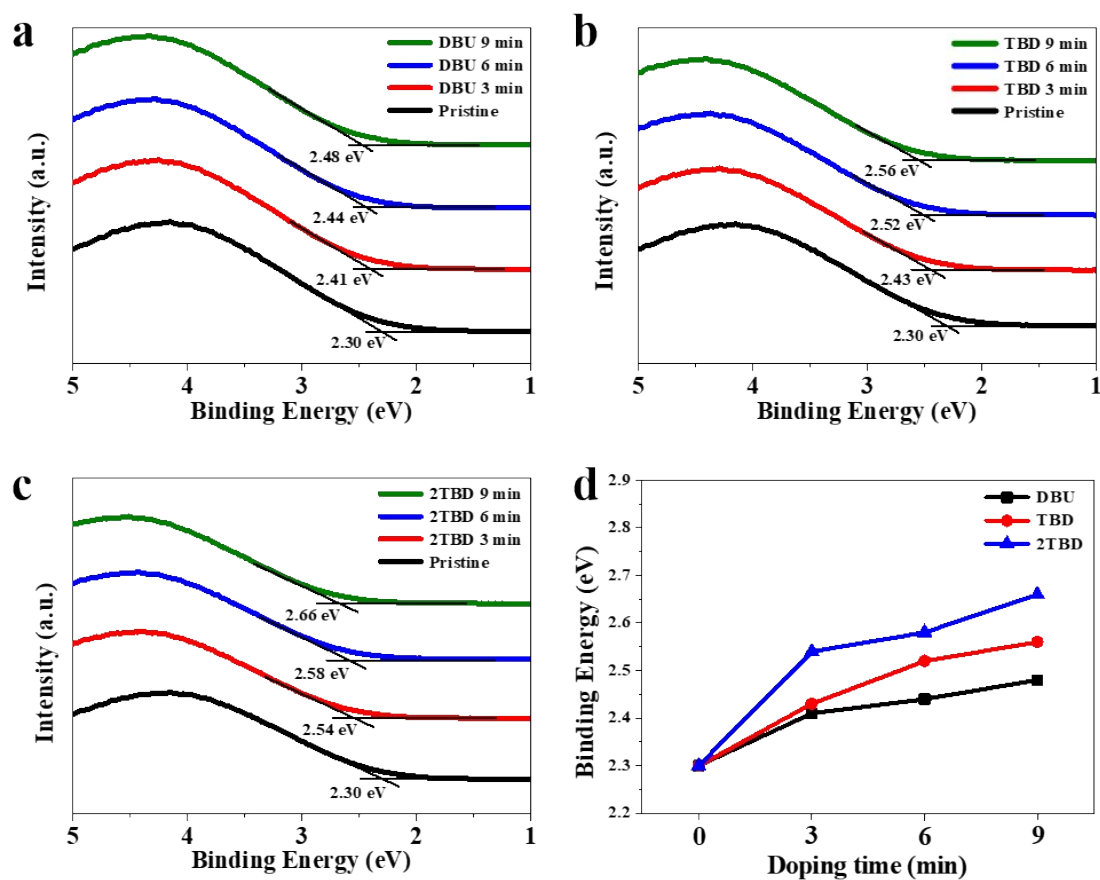

**Fig. S1** UPS spectra of ZnO layer with different sublimation-doping times of DBU, TBD, and 2TBD. The valence band edge of UPS spectra shows distance between the Fermi energy level and valence band by doping ZnO layer with a) DBU, b) TBD and c) 2TBD. d) Changes of the valence band edge as a function of doping times and types of dopants.

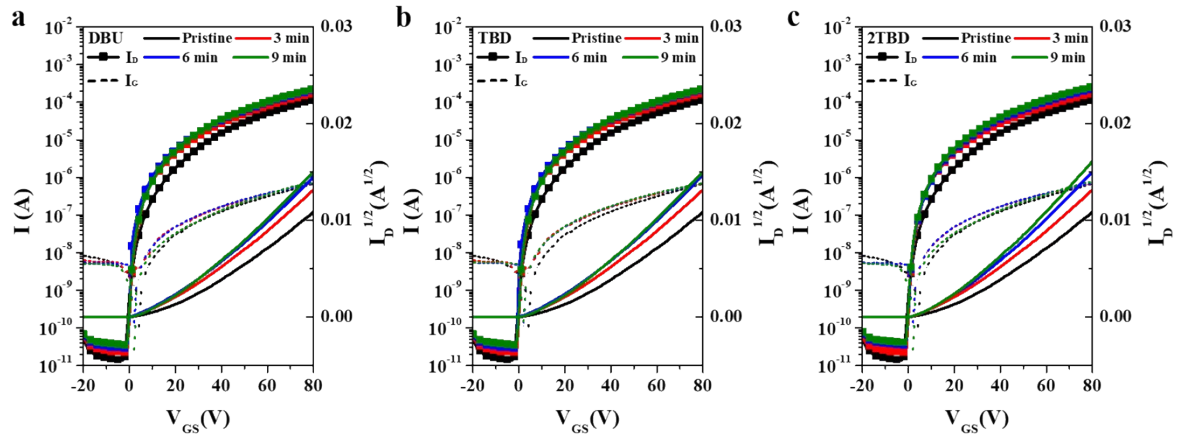

**Fig. S2** Representative transfer characteristics of ZnO TFT with SiO<sub>2</sub> gate dielectric a) DBU- b) TBD-, c) 2TBD-doping with various times of sublimation-doping, measured at  $V_D = 80$  V.

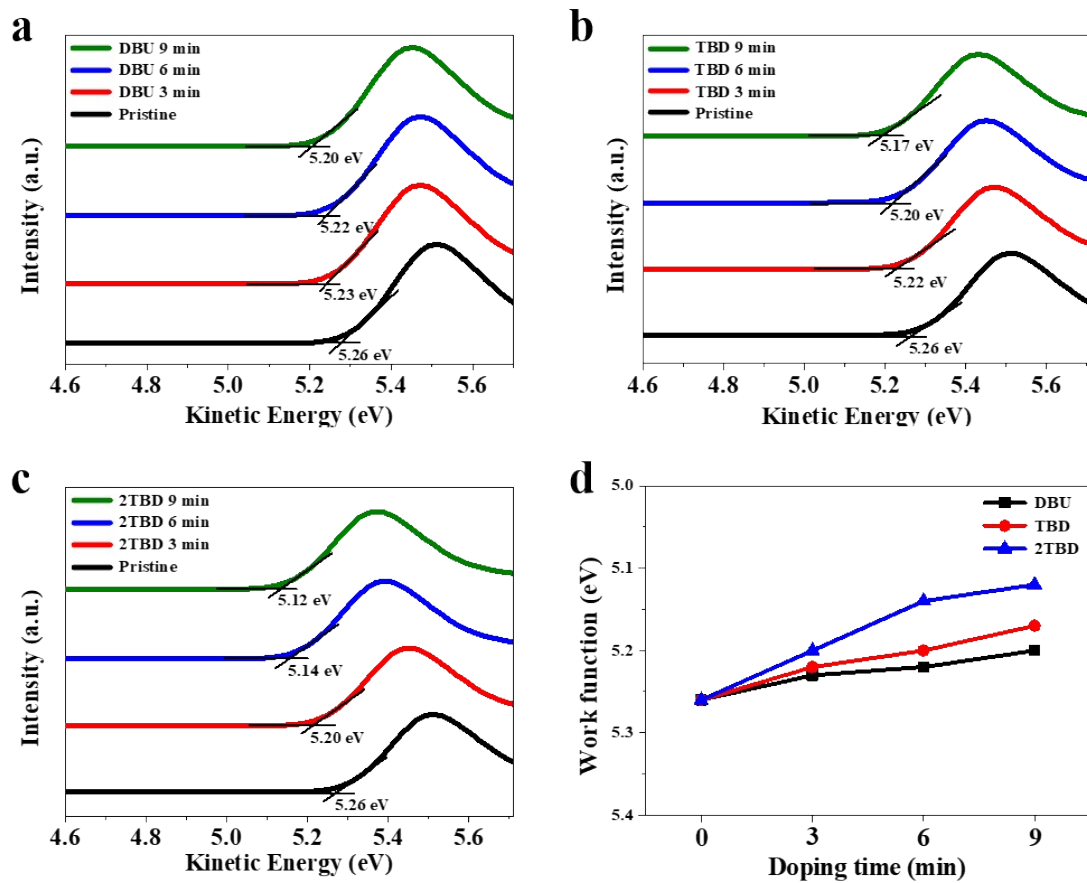

**Fig. S3** UPS spectra of  $\text{In}_2\text{O}_3$  layer with different sublimation-doping times of DBU, TBD, and 2TBD. The secondary cut-off edges of UPS spectra show work function changes by doping  $\text{In}_2\text{O}_3$  layer with a) DBU, b) TBD and c) 2TBD. d) Change of work functions as a function of doping times and types of dopants.

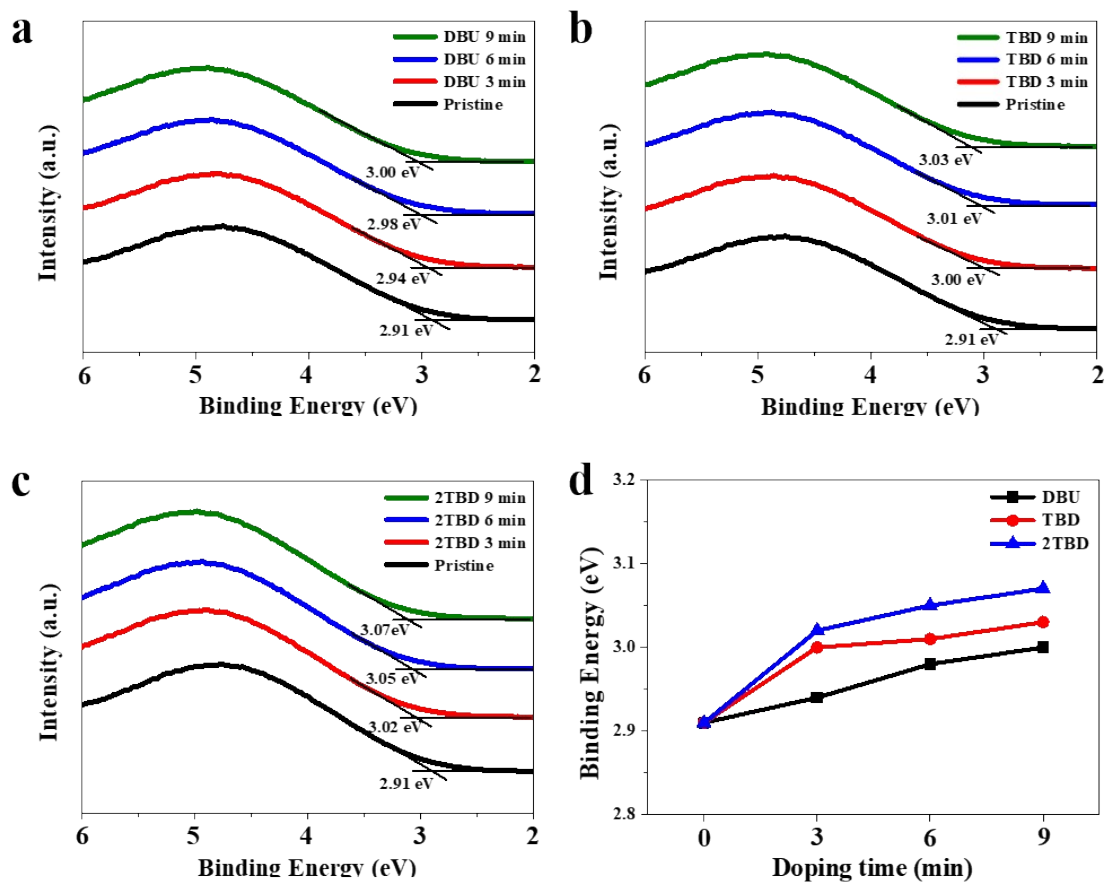

**Fig. S4** UPS spectra for  $\text{In}_2\text{O}_3$  layer with different sublimation-doping times of DBU, TBD, and 2TBD. The valence band edge of UPS spectra shows distance between the Fermi energy level and valence band by doping  $\text{In}_2\text{O}_3$  layer with a) DBU, b) TBD and c) 2TBD. d) Changes of the valence band edge as a function of doping times and types of dopants.

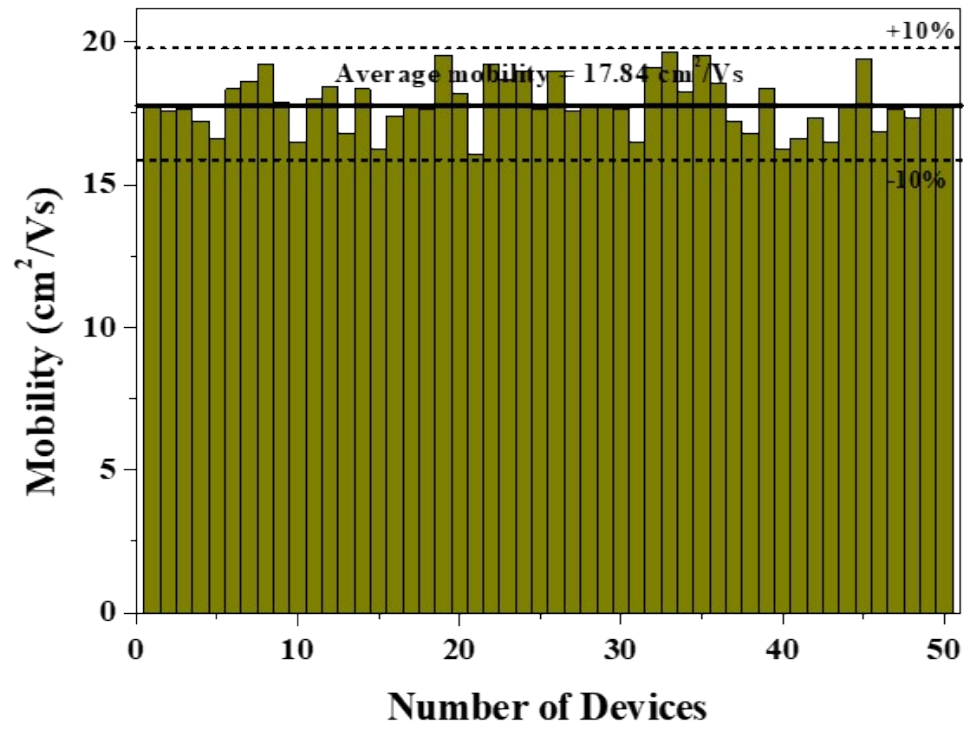

**Fig. S5** Histograms of the mobility for 6 min 2TBD doped In<sub>2</sub>O<sub>3</sub>/ZnO heterojunction TFT with SiO<sub>2</sub> gate dielectric. Reproducibility tests are conducted for 50 independently fabricated TFTs using the optimized condition, and electron mobility distributions with deviation <±10% are demonstrated.

**Table S1** Trap density of ZnO and In<sub>2</sub>O<sub>3</sub>/ZnO TFTs for Si/SiO<sub>2</sub> (300 nm) substrates.

| ZnO                                                   | Pristine | DBU 3min | DBU 6min | DBU 9min | TBD 3min | TBD 6min | TBD 9min | 2TBD 3min | 2TBD 6min | 2TBD 9min |
|-------------------------------------------------------|----------|----------|----------|----------|----------|----------|----------|-----------|-----------|-----------|
| V <sub>Th</sub> (V)                                   | 8.81     | 9.12     | 10.15    | 11.13    | 9.79     | 10.77    | 10.46    | 9.48      | 10.46     | 11.80     |
| N <sub>tr</sub> (x10 <sup>11</sup> cm <sup>-2</sup> ) | 6.06     | 6.27     | 6.97     | 7.65     | 6.74     | 7.40     | 7.19     | 6.52      | 7.19      | 8.11      |
| In <sub>2</sub> O <sub>3</sub> /ZnO                   | Pristine | DBU 3min | DBU 6min | DBU 9min | TBD 3min | TBD 6min | TBD 9min | 2TBD 3min | 2TBD 6min | 2TBD 9min |
| V <sub>Th</sub> (V)                                   | 6.11     | 6.12     | 8.31     | 9.22     | 6.33     | 7.05     | 7.77     | 5.96      | 7.05      | 6.69      |
| N <sub>tr</sub> (x10 <sup>11</sup> cm <sup>-2</sup> ) | 4.21     | 4.20     | 5.71     | 6.33     | 4.35     | 4.84     | 5.34     | 4.10      | 4.84      | 4.59      |

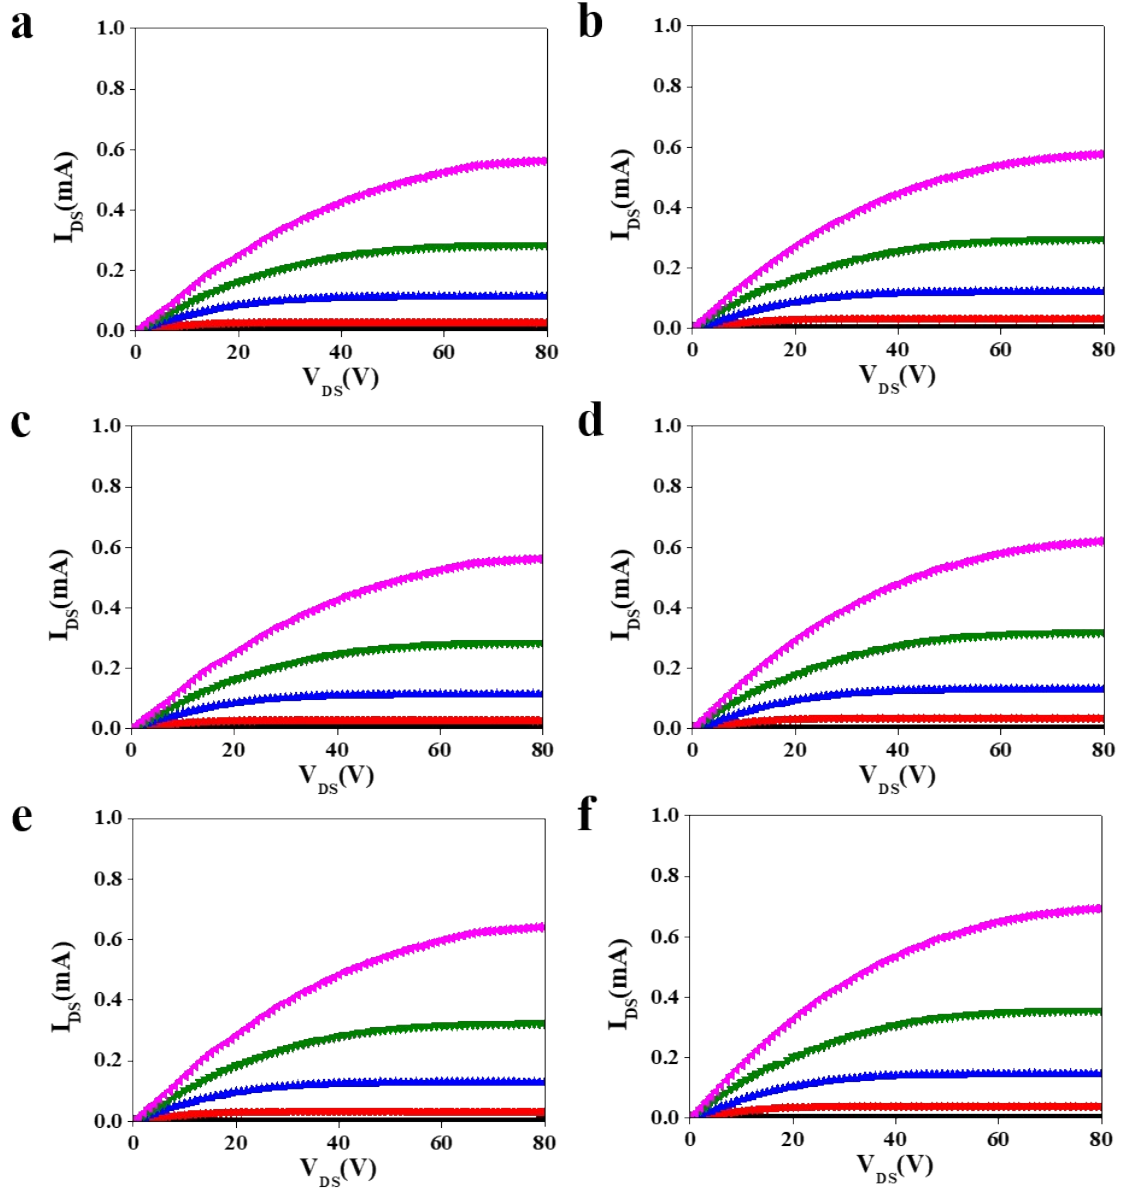

**Fig. S6** Output characteristics of  $\text{In}_2\text{O}_3/\text{ZnO}$  heterojunction TFT with a) 3 min DBU-, b) 9 min DBU-, c) 3 min TBD-, d) 9 min TBD-, e) 3 min 2TBD-, f) 9 min 2TBD-doping with  $\text{SiO}_2$  gate dielectric. The gate voltage was increasingly varied between 0 V and 80 V in step of 20 V.

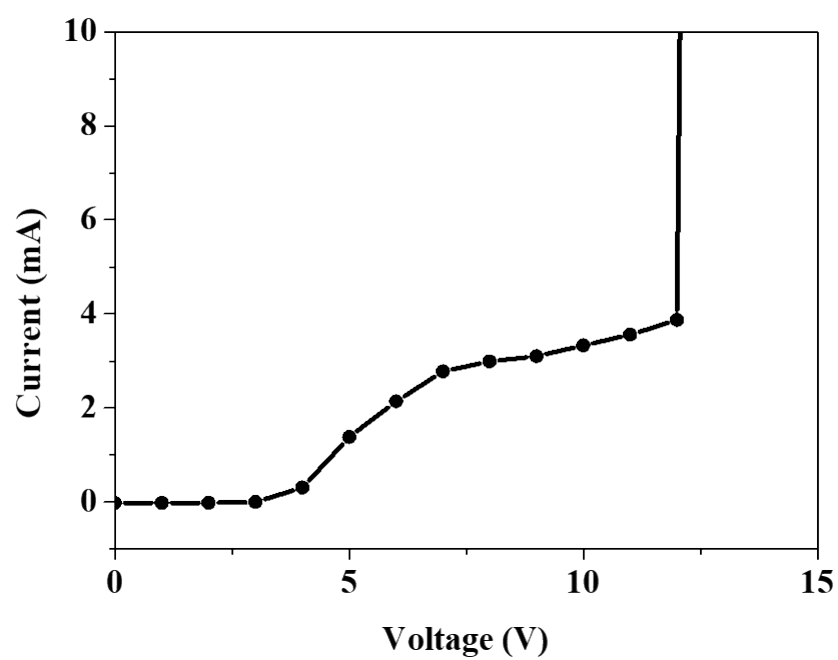

**Fig. S7** Breakdown voltage characteristics of dielectric layer in a MIM capacitor.

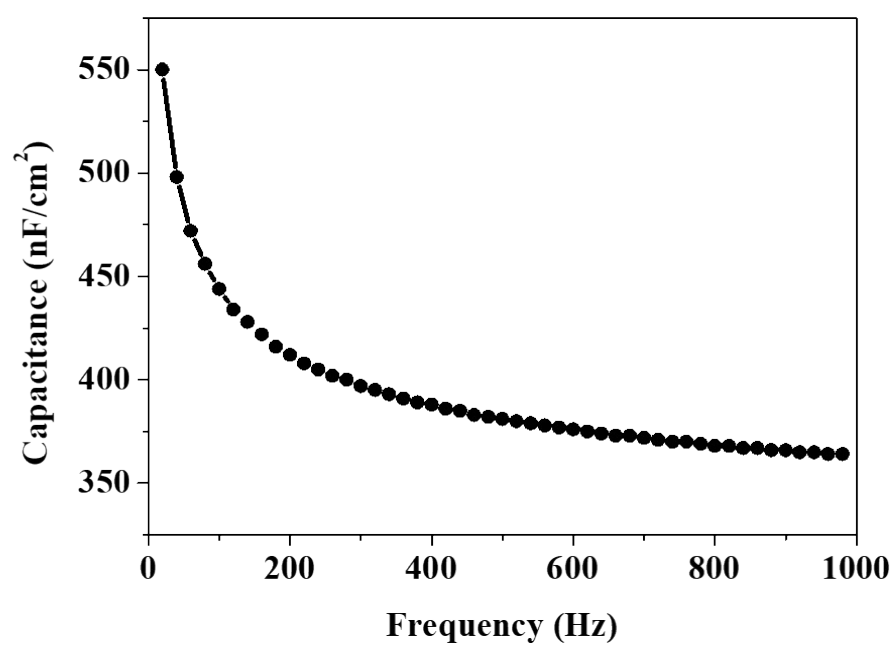

**Fig. S8** Capacitance-frequency characteristics of dielectric layer in a MIM capacitor.

## Reference

- S1.** H. Nakayama, J. A. Schneider, M. Faust, H. Wang, J. R. D. Alaniz, M. L. Chabiny, *Mater. Chem. Front.*, 2020, **4**, 3616-3622.
- S2.** L. Hu, T. Liu, J. Duan, X. Ma, C. Ge, Y. Jiang, F. Qin, S. Xiong, F. Jiang, B. Hu, X. Gao, Y. Yi, Y. Zhou, *Adv. Funct. Mater.*, 2017, **27**, 1703254.
- S3.** D. Nirmal, J. Ajayan, *Handbook for III-V High Electron Mobility Transistor Technologies*, CRC Press, Boca Raton 2019.
